# Supplementary material for: Facile construction of leaf-like WO3 nanoflakes decorated on g-C3N4 towards efficient oxidation of alcohols under mild conditions
Source: Royal Society of Chemistry journal article supplement (doi:10.1039/c8nj03328e), 2018-01-01
Supplement: c8nj03328e1.pdf [file c8nj03328e1.pdf]

## *Supporting Information*

### **Facile construction of leaf-like WO<sub>3</sub> nanoflakes decorated on g-C<sub>3</sub>N<sub>4</sub> towards efficient oxidation of alcohols under mild conditions**

Cai Xu, Xiaozhong Wang, Gang Xu,\* Yingqi Chen, Liyan Dai\*

Zhejiang Provincial Key Laboratory of Advanced Chemical Engineering Manufacture  
Technology, College of Chemical and Biological Engineering, Zhejiang University,  
Hangzhou 310027, China

\*Corresponding authors.

(G. Xu) E-mail: xugang\_1030@zju.edu.cn; Tel: +86 571 87952363.

(L. Dai) E-mail: dailiyan@zju.edu.cn; Tel: +86 571 87952693; Fax: +86 571 87953294.

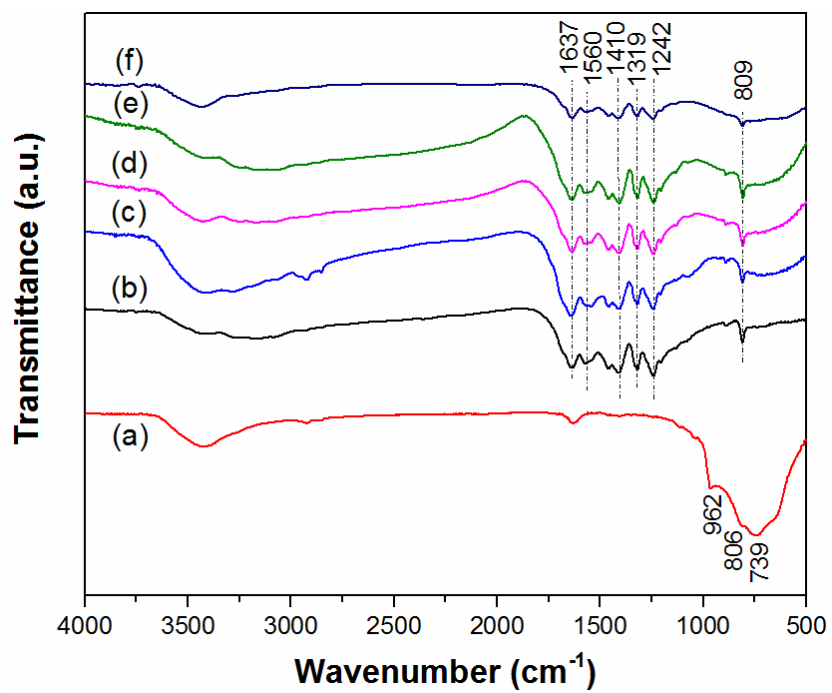

**Fig. S1** FT-IR spectra of (a) WO<sub>3</sub>, (b) g-C<sub>3</sub>N<sub>4</sub>, (c) 1WO<sub>3</sub>/g-C<sub>3</sub>N<sub>4</sub>, (d) 2WO<sub>3</sub>/g-C<sub>3</sub>N<sub>4</sub>, (e) 3WO<sub>3</sub>/g-C<sub>3</sub>N<sub>4</sub> and (f) 4WO<sub>3</sub>/g-C<sub>3</sub>N<sub>4</sub>.

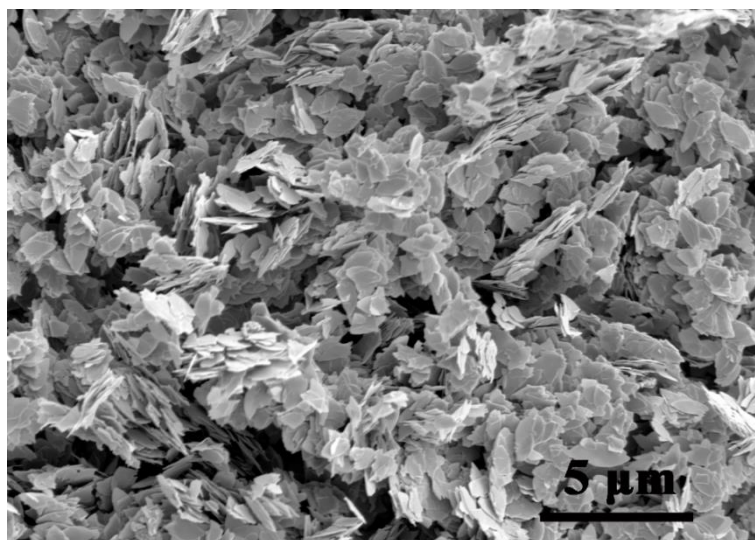

**Fig. S2** FESEM image of pure WO<sub>3</sub>.

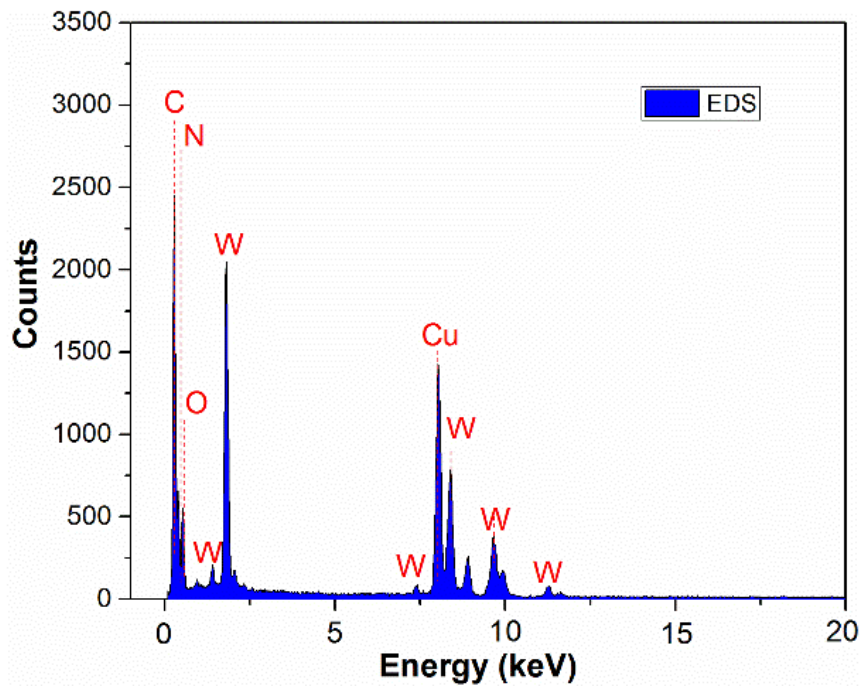

**Fig. S3** The corresponding energy dispersive X-ray spectrum (EDS) of  $3\text{WO}_3/\text{g-C}_3\text{N}_4$  from HAADF-STEM mode. The detected Cu signals come from the copper grid that supports the TEM samples.

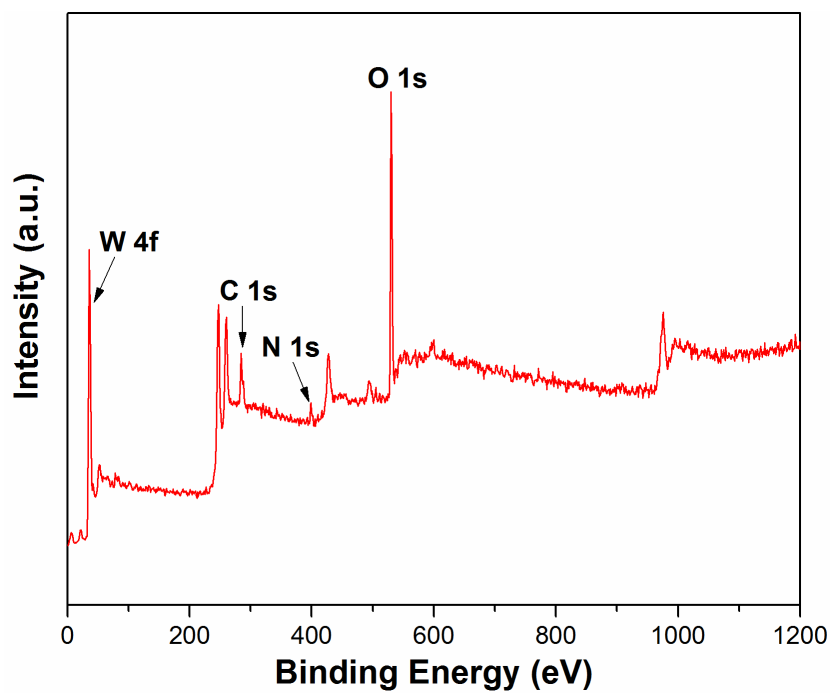

**Fig. S4** Wide-range XPS spectrum of 3WO<sub>3</sub>/g-C<sub>3</sub>N<sub>4</sub> sample.

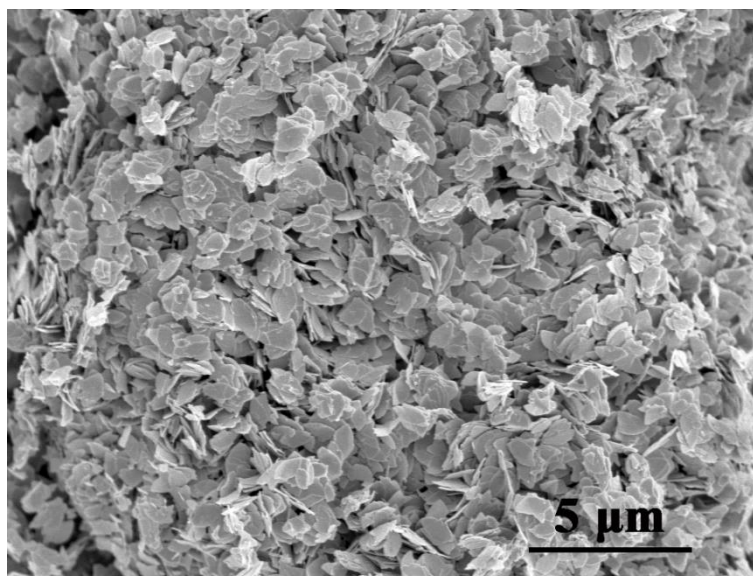

**Fig. S5** FESEM image of 4WO<sub>3</sub>/g-C<sub>3</sub>N<sub>4</sub> catalyst.

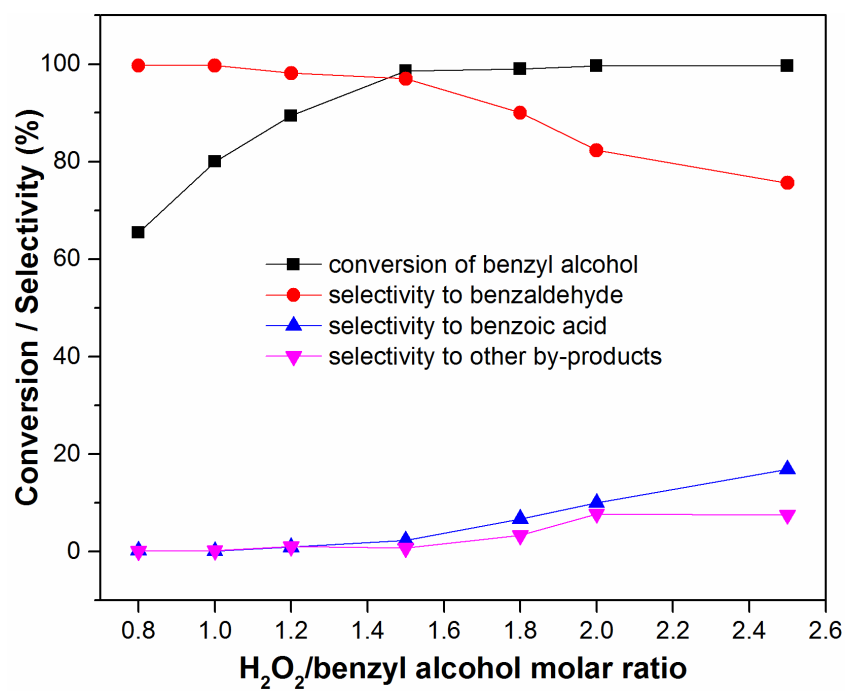

**Fig. S6** Effect of H<sub>2</sub>O<sub>2</sub> dosage on catalytic performance of 3WO<sub>3</sub>/g-C<sub>3</sub>N<sub>4</sub>. Reaction conditions: 0.5 mmol benzyl alcohol, 1 ml H<sub>2</sub>O, 10 mg catalyst, 80 °C, 3 h.

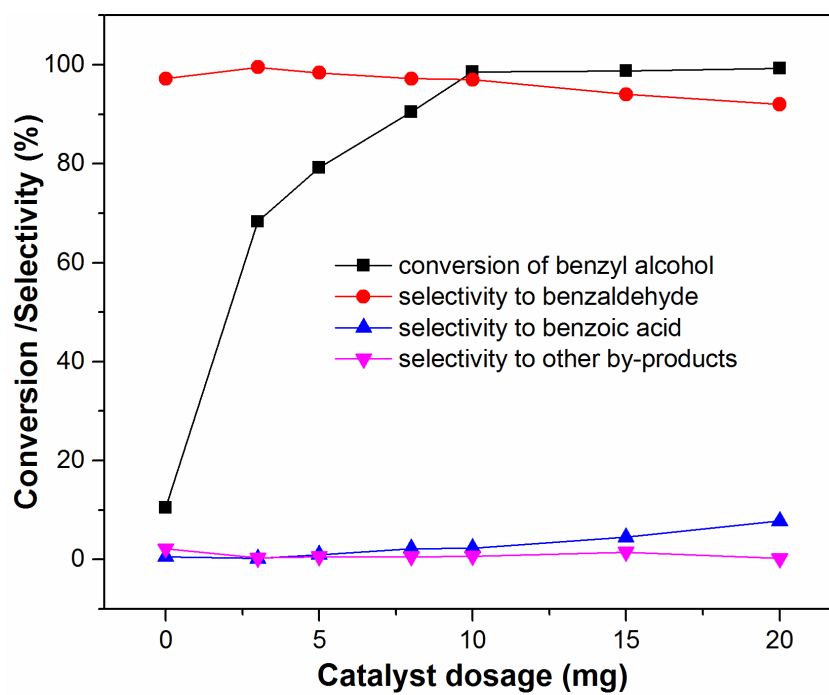

**Fig. S7** Effect of catalyst dosage on catalytic performance of 3WO<sub>3</sub>/g-C<sub>3</sub>N<sub>4</sub>. Reaction conditions: 0.5 mmol benzyl alcohol, 0.75 mmol H<sub>2</sub>O<sub>2</sub>, 1 ml H<sub>2</sub>O, 80 °C, 3 h.



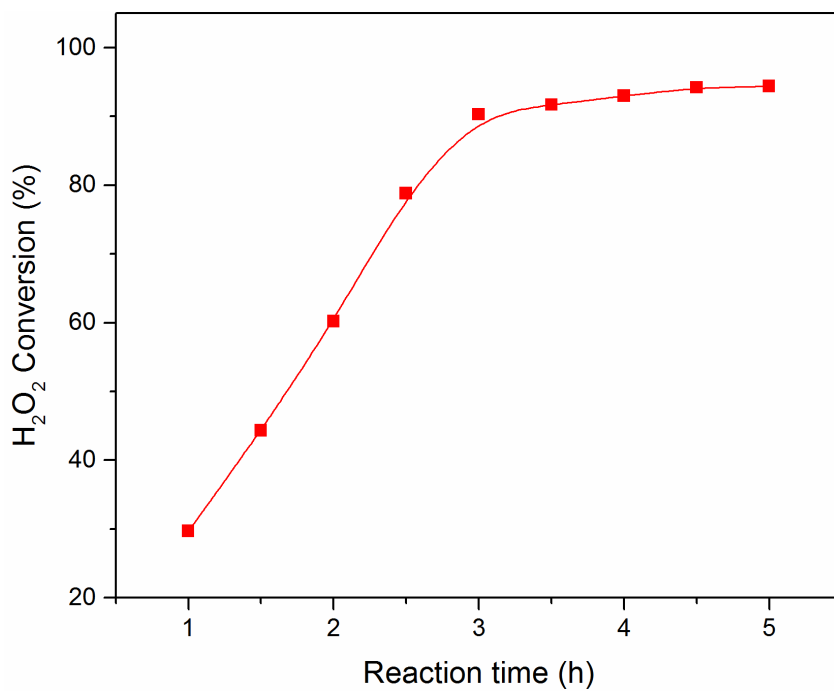

**Fig. S8** Changes of the H<sub>2</sub>O<sub>2</sub> conversion with the reaction time in the selective oxidation of benzyl alcohol to benzaldehyde over 3WO<sub>3</sub>/g-C<sub>3</sub>N<sub>4</sub> catalyst.

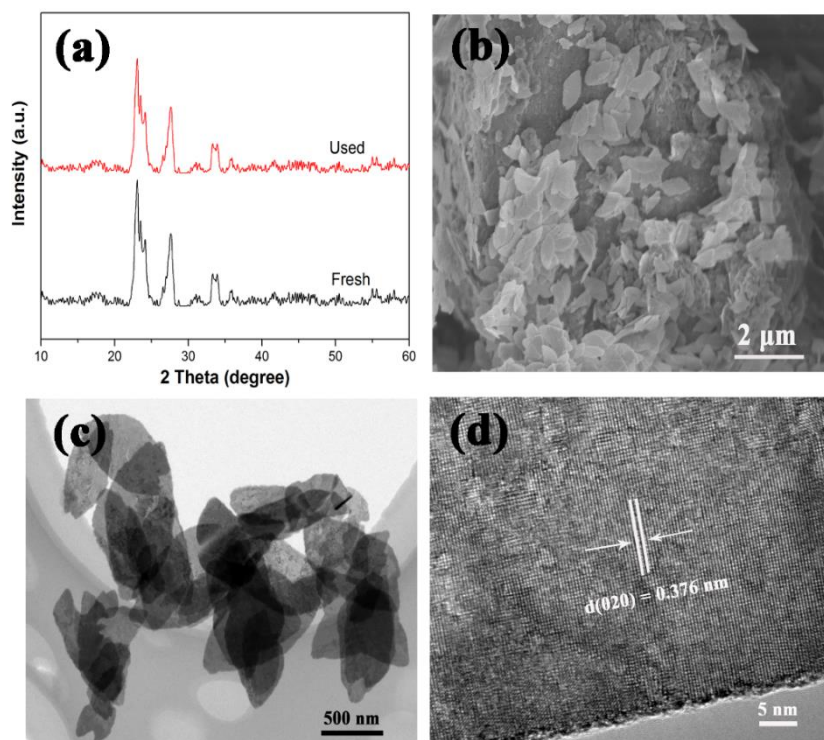

**Fig. S9** (a) XRD patterns of the fresh and used  $3\text{WO}_3/\text{g-C}_3\text{N}_4$  catalyst, (b) FESEM image, (c) TEM image and (d) HRTEM image of the used  $3\text{WO}_3/\text{g-C}_3\text{N}_4$  catalyst.

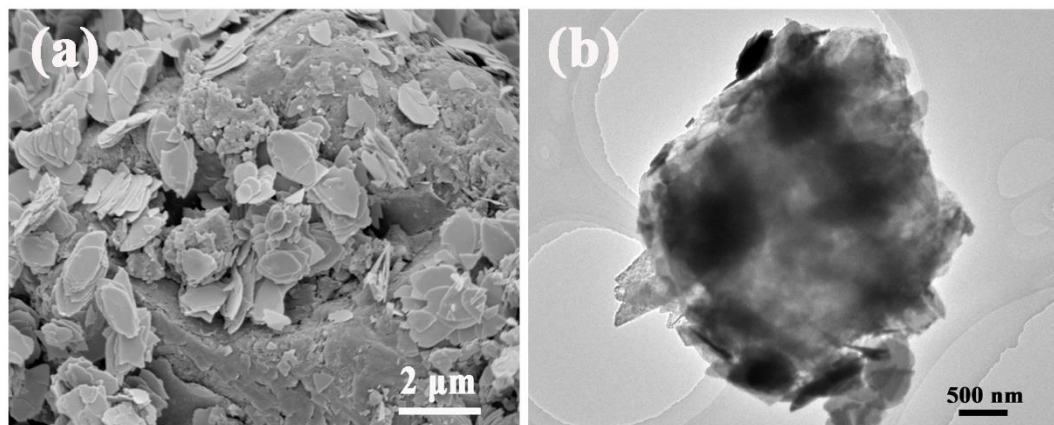

**Fig. S10** (a) SEM image and (b) TEM image of the  $3\text{WO}_3/\text{g-C}_3\text{N}_4$  catalyst.

## **Experimental details for GC analysis**

Quantitative analysis of the reaction products was used the external standard method with gas chromatography (Agilent 6820, FID detector). Firstly, a series of solutions of standard samples (benzyl alcohol, benzaldehyde and benzoic acid) in ethyl acetate with different concentrations were prepared, respectively. Then, the solutions were analyzed with GC to determine the corresponding working curve and calculate the linear regression equation, respectively. Based on the peak areas of the different substances, we can Fig. out the conversion of reactants and the selectivity to different products. The reactants and reaction products were identified by comparing the retention time with that of the known standard samples.

The GC detecting conditions were as follows: nitrogen as the carrier gas; injection port temperature = 300 °C; detector (FID) temperature = 300 °C; column temperature = 50 °C (maintained for one min), and then heating up to 200 °C at a heating rate of 10 °C/min (maintained for one min).

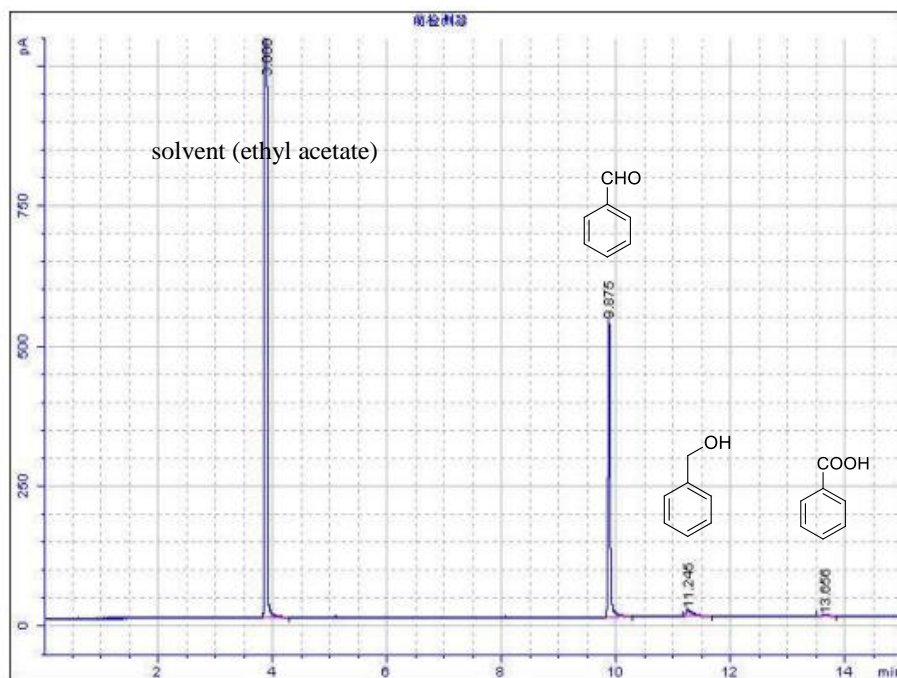

**Fig. S11** The typical GC diagram for the selective oxidation of benzyl alcohol. (T = 3.880 min, solvent/ethyl acetate; T = 9.875 min, benzaldehyde; T = 11.245 min, benzyl alcohol; T = 13.656 min, benzoic acid.)

### **Effect of solvents on the catalytic oxidation reaction**

The catalytic oxidation of benzyl alcohol was investigated in different solvents using  $3\text{WO}_3/\text{g-C}_3\text{N}_4$  as the catalyst and  $\text{H}_2\text{O}_2$  as the oxidant, and the results were presented in Table S1. It can be found that both conversion of benzyl alcohol and selectivity to benzaldehyde were very poor when toluene and cyclohexane were used as the solvents (Table S1, entries 6 and 7), which may be associated with the poor miscibility of aqueous  $\text{H}_2\text{O}_2$  and water-insoluble solvents (toluene and cyclohexane). In addition, with respect to the other organic solvents, such as  $\text{CH}_3\text{CN}$ , THF, DMF, 1,4-dioxane (Table S1 entries 2–5), only moderate catalytic performance were achieved under the optimized reaction conditions. However, when water was used as the solvent (Table S1, entry 1), the most satisfactory catalytic activity with 98.6% conversion and 97.0% selectivity to target product was obtained. It was because that the  $\text{WO}_3/\text{g-C}_3\text{N}_4$  catalyst has a good dispersion in water, which could expose more active sites for the catalytic reaction. On the other hand,  $\text{WO}_3$  has an excellent hydrophilic property,<sup>1–3</sup> which could more readily interact with  $\text{H}_2\text{O}_2$  molecules in aqueous media to more give active oxygen species, and thus leading to the highest catalytic activity among the selected solvents.

**Table S1** Effect of different solvents on catalytic oxidation of benzyl alcohol <sup>a</sup>

| Entry | Solvent            | Conversion (%) | Selectivity (%) | Yield (%) <sup>b</sup> |
|-------|--------------------|----------------|-----------------|------------------------|
| 1     | H <sub>2</sub> O   | 98.6           | 97.0            | 95.6                   |
| 2     | CH <sub>3</sub> CN | 66.8           | 84.9            | 56.7                   |
| 3     | THF                | 50.5           | 85.8            | 43.3                   |
| 4     | DMF                | 74.9           | 88.7            | 66.4                   |
| 5     | 1,4-dioxane        | 45.7           | 78.5            | 35.9                   |
| 6     | Toluene            | 32.6           | 67.8            | 22.1                   |
| 7     | Cyclohexane        | 44.5           | 82.7            | 36.8                   |

<sup>a</sup> Reaction conditions: 0.5 mmol benzyl alcohol, 0.75 mmol H<sub>2</sub>O<sub>2</sub>, 1 ml solvent, 10 mg 3WO<sub>3</sub>/g-C<sub>3</sub>N<sub>4</sub> catalyst, 80 °C, 3 h. <sup>b</sup> The yields of the reactions were determined by GC analysis with external standard method.

## References

- 1 C. Gu, J. Zhang and J. Tu, *J. Colloid Interface Sci.*, 2010, **352**, 573–579.
- 2 M. Kalisz, M. Grobelny, D. Kaczmarek, J. Domaradzki, M. Mazur and D. Wojcieszak, *Appl. Surf. Sci.*, 2017, **421**, 185–190.
- 3 A. O. T. Patrocinio, L. F. Paula, R. M. Paniago, J. Freitag and D. W. Bahnemann, *ACS Appl. Mater. Interfaces*, 2014, **6**, 16859–16866.
